# Supplementary material for: Effects of Tourist and Researcher Presence on Fecal Glucocorticoid Metabolite Levels in Wild, Habituated Sulawesi Crested Macaques (Macaca nigra)
Source: MDPI journal article supplement (doi:10.3390/ani13182842), 2023-09-07

Figure S2. Female FGCM (ng/g) response to daily numbers of researchers present within the group. Lines show predicted values for each group; shading shows 95% confidence intervals; dots show raw data points.

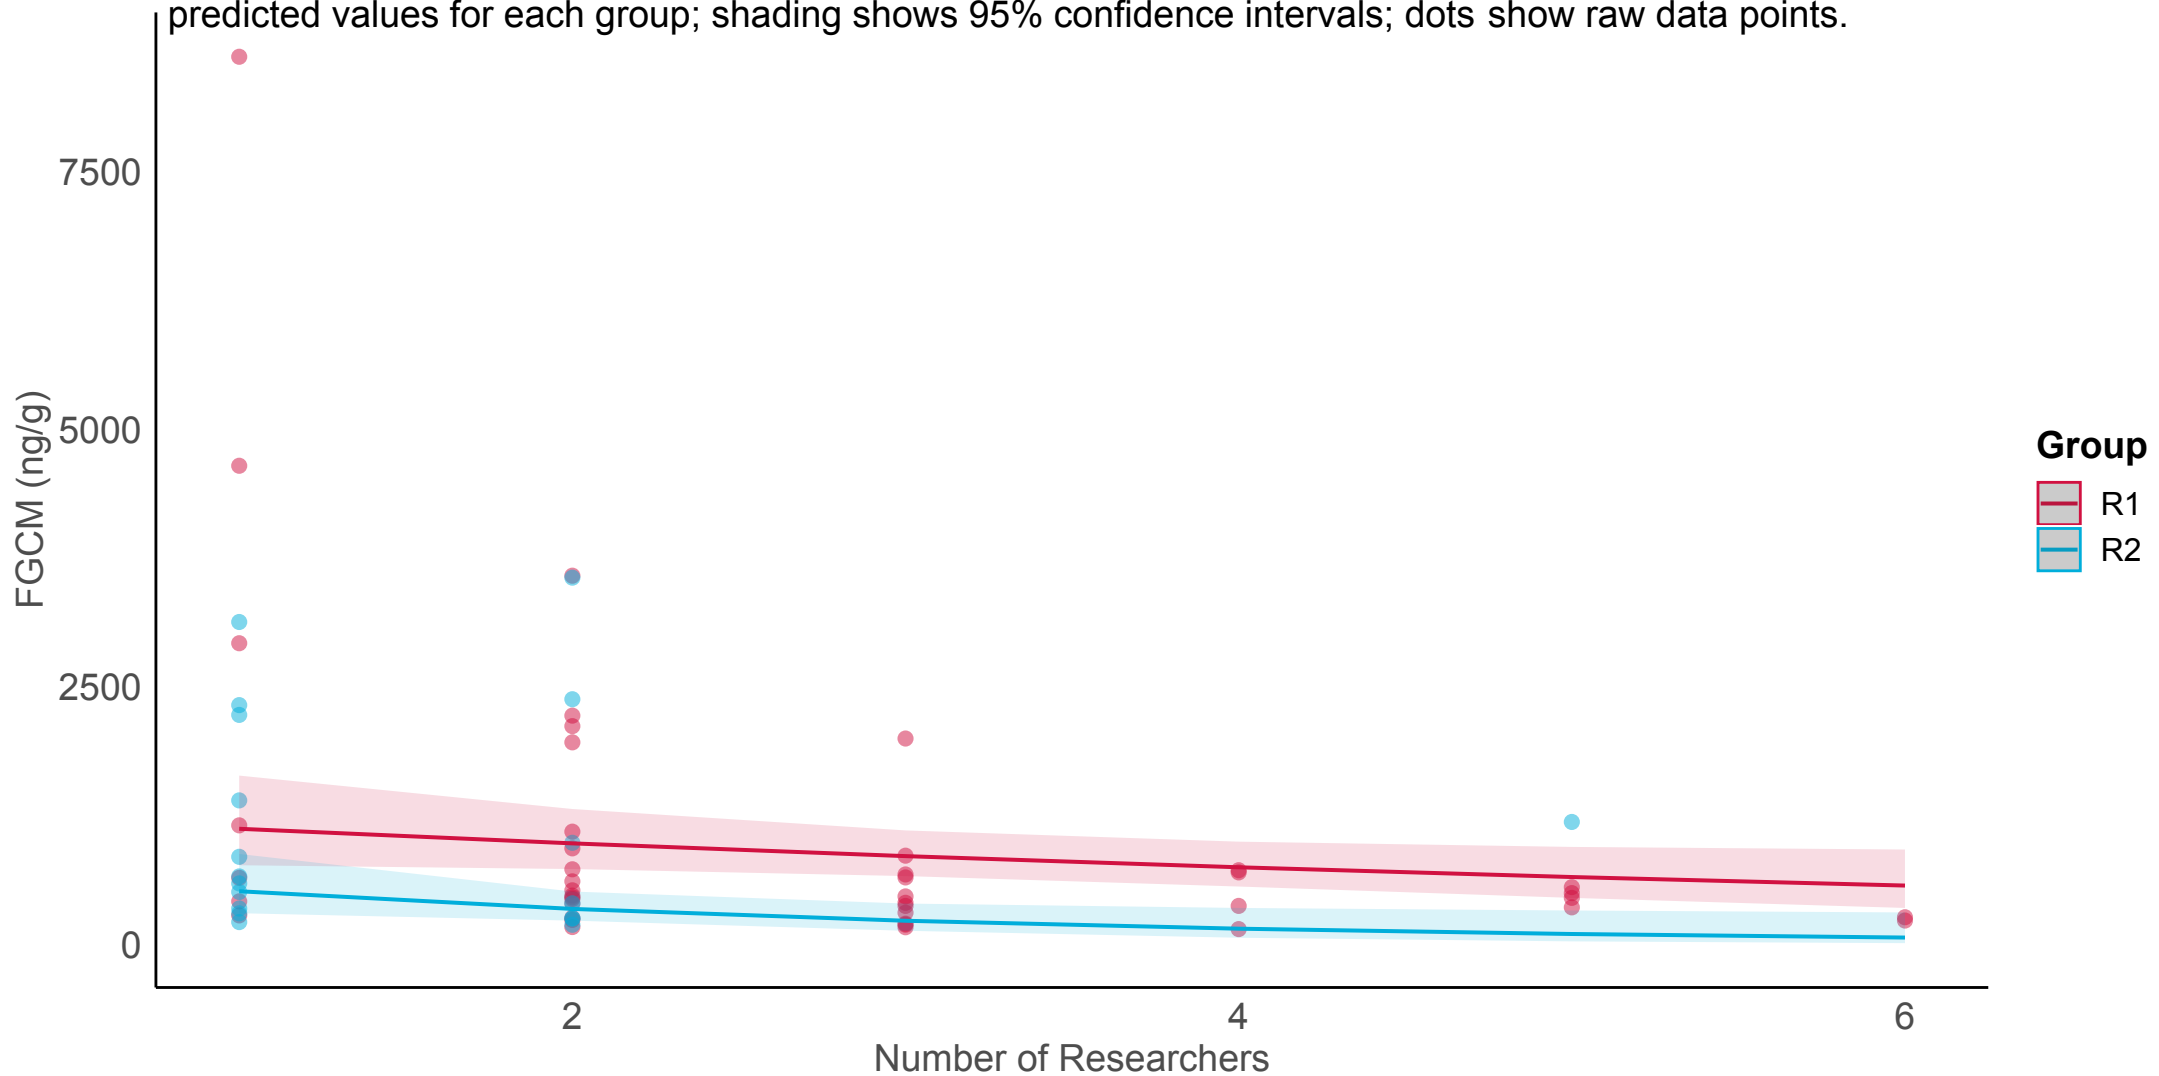

Supplement: s1 [file s1]
