# Supplementary material for: Effects of Tourist and Researcher Presence on Fecal Glucocorticoid Metabolite Levels in Wild, Habituated Sulawesi Crested Macaques (Macaca nigra)
Source: MDPI journal article supplement (doi:10.3390/ani13182842), 2023-09-07
Supplement: s1 [file s1]

**Table S2. *Macaca nigra* Behaviors Analyzed<sup>1</sup>**

| BEHAVIOR                                       | DEFINTION                                                                                                            |
|------------------------------------------------|----------------------------------------------------------------------------------------------------------------------|
| <b>PHYSICAL ACTIVITY – Point Time Sampling</b> |                                                                                                                      |
| <b>walk</b>                                    | Actively moving at a slow pace.                                                                                      |
| <b>run</b>                                     | Actively moving at a quick pace.                                                                                     |
| <b>climb up</b>                                | Actively climbing up.                                                                                                |
| <b>climb down</b>                              | Actively climbing down.                                                                                              |
| <b>AGONISTIC-- Continuous Sampling</b>         |                                                                                                                      |
| <b>chase</b>                                   | To run after another individual on more than 2 meters to make it run away and/or bite/hit/grab it.                   |
| <b>bite</b>                                    | To bite another individual.                                                                                          |
| <b>hit</b>                                     | To hit another individual with any limb                                                                              |
| <b>grab</b>                                    | To catch and hold in a hand a bunch of fur of another one to retain it.                                              |
| <b>push</b>                                    | To push with hand or body to make an individual moving away.                                                         |
| <b>lunge</b>                                   | To make a short run (< 2 meters) or a jump toward an individual (warning that could lead to an aggressive behavior.) |
| <b>scream</b>                                  | Noisy scream vocalization.                                                                                           |
| <b>flight</b>                                  | To run away in response to another's approach/aggression.                                                            |
| <b>crouch</b>                                  | To press body on the ground, 4 limbs flexed in response to another's approach/aggression.                            |
| <b>protection</b>                              | An individual threatened or attacked by another approaches                                                           |
| <b>seeking</b>                                 | and contacts a third individual.                                                                                     |

<sup>1</sup> Definitions were based on those used by the Macaca Nigra Project. A few were modified to fit the needs of this study.
