# Supplementary material for: Effects of Tourist and Researcher Presence on Fecal Glucocorticoid Metabolite Levels in Wild, Habituated Sulawesi Crested Macaques (Macaca nigra)
Source: Animals (Basel). 2023 Sep 7;13(18):2842. doi: 10.3390/ani13182842 (PMC10525950; doi:10.3390/ani13182842)
Supplement: Supplementary file 1 [file animals-13-02842-s001.zip]

Archive with 5 entries (5 files):
- Figure S1 COLOR Female FGCM ng-g Response to Daily Tourists.pdf
- Figure S2 COLOR Female FGCM ngg Response to Daily Researchers.pdf
- Table S1 - M.Nigra TNR FocalIDs.xlsx
- Table S2 - TourismFecalTangkokoEthogramofMacaca_nigraBehaviors.pdf
- Table S3 - TourismFecalTangkokoGLMMModelSpecs (2).xlsx
