# Supplementary material for: Effects of Tourist and Researcher Presence on Fecal Glucocorticoid Metabolite Levels in Wild, Habituated Sulawesi Crested Macaques (Macaca nigra)
Source: Animals (Basel). 2023 Sep 7;13(18):2842. doi: 10.3390/ani13182842 (PMC10525950; doi:10.3390/ani13182842)
Supplement: Supplementary file 1 [file animals-13-02842-s001.zip › Table S1 - M.Nigra TNR FocalIDs.xlsx]

## Sheet: Sheet1
Table S1. Macaca nigra Focal Subjects
Group	ID	RANK	Class Age	Sex
R1	gs	low	middle	F
R1	hs	middle	middle	F
R1	qs	high	middle	F
R1	cu	middle	young	F
R1	fu	low	young	F
R1	nu	high	young	F
R1	ej	10	old	M
R1	om	9	old	M
R1	mm	5	middle	M
R1	ll	3	middle	M
R1	ak	1	middle	M
R1	kn	6	middle	M
PB1	bp	high	middle	F
PB1	cp	middle	middle	F
PB1	rp	low	middle	F
PB1	up	low	young	F
PB1	aa	middle	young	F
PB1	ba	high	young	F
PB1	fm	4	middle	M
PB1	ql	3	middle	M
PB1	ul	1	middle	M
PB1	uk	2	young	M
R2	fd	high	middle	F
R2	id	middle	middle	F
R2	td	low	middle	F
R2	zd	high	middle	F
R2	od	middle	young	F
R2	qd	low	young	F
R2	wj	4	old	M
R2	tl	2	middle	M
R2	rn	1	middle	M
R2	rm	6	old	M
R2	an	5	middle	M
