# Supplementary material for: Effects of Tourist and Researcher Presence on Fecal Glucocorticoid Metabolite Levels in Wild, Habituated Sulawesi Crested Macaques (Macaca nigra)
Source: Animals (Basel). 2023 Sep 7;13(18):2842. doi: 10.3390/ani13182842 (PMC10525950; doi:10.3390/ani13182842)
Supplement: Supplementary file 1 [file animals-13-02842-s001.zip › Table S3 - TourismFecalTangkokoGLMMModelSpecs (2).xlsx]

## Sheet: Sheet1
Table S3. Detailed Description of Model Factors
Hypothesis	Tourist Conditions	Groups Included	Sex	R Code
All (Null)	Undisturbed, exposure, post exposure; Undisturbed vs exposure vs post exposure	R1, R2, PB1	Females	glmer(response~fruit availability + number of infants + associated random effects of monkey ID and sample time or monkey ID and sample
			Males	glmer(response~fruit availability + number of estrous females + associated random effects of monkey ID and sample time or monkey ID and sample
H1	Undisturbed	R1, R2, PB1	Females	glmer(response~ (estradiol*rank) + (group * tourists in the forest each month) + monthly number of crop defense events + fruit availability + number of infants + (1|Monkey ID) + (1|sample time), family="poisson", data=databasename)
			Males	glmer(response~ (testosterone*rank) + (group * tourists in the forest each month) + monthly number of crop defense events + fruit availability + number of estrous females + (1|Monkey ID) + (1|sample time), family="poisson", data=databasename)
H1	Exposure	R1, R2	Females	glmer(response~ (estradiol*rank) + (group * tourists in the forest each month) + (number of tourists that day in each group * group) + monthly number of crop defense events + fruit availability + number of infants + (1|Monkey ID) + (1|sample time), family="poisson", data=databasename)
			Males	glmer(response~ (testosterone*rank) + (group * tourists in the forest each month) + (number of tourists that day in each group * group)+ monthly number of crop defense events + fruit availability + number of estrous females + (1|Monkey ID) + (1|sample time), family="poisson", data=databasename)
H2	Undisturbed vs exposure vs post exposure	R1, R2	Females	glmer(response~ (estradiol*rank) + (group * tourist condition sample) + tourists in each group each month + monthly number of crop defense events + fruit availability + number of infants + (1|Monkey ID) + (1|sample time), family="poisson", data=databasename)
			Males	glmer(response~ (testosterone*rank) + (group * tourist condition sample) + tourists in each group each month + monthly number of crop defense events + fruit availability + number of estrous females + (1|Monkey ID) + (1|sample time), family="poisson", data=databasename)
H3	Undisturbed	R1, R2, PB1	Females	glmer(response~ (estradiol*rank) + (number of researchers*group) + monthly number of crop defense events + fruit availability + number of infants + (1|Monkey ID) + (1|sample time), family="poisson", data=databasename)
			Males	glmer(response~ (testosterone*rank) + (number of researchers*group) + monthly number of crop defense events + fruit availability + number of estrous females + (1|Monkey ID) + (1|sample time), family="poisson", data=databasename)
H3	Exposure	R1, R2	Females	glmer(response~ (estradiol*rank) + (group * tourists in the forest each month) + (number of researchers that day in each group * group) + monthly number of crop defense events + fruit availability + number of infants + (1|Monkey ID) + (1|sample time), family="poisson", data=databasename)
			Males	glmer(response~ (testosterone*rank) + (group * tourists in the forest each month) + (number of researchers that day in each group * group) + monthly number of crop defense events + fruit availability + number of estrous females + (1|Monkey ID) + (1|sample time), family="poisson", data=databasename)
H4 (for FAI, Hormones, Rank, No. of infants, No. of estrous females)	Undisturbed, exposure, post exposure; Undisturbed vs exposure vs post exposure	R1, R2, PB1	Females	glmer(response~fruit availability + number of infants + rank + estradiol + associated random effects of monkey ID and sample time or monkey ID and sample
			Males	glmer(response~fruit availability + number of estrous females + rank + testosterone + associated random effects of monkey ID and sample time or monkey ID and sample
H4 (for rainfall & locomotion)	Undisturbed, exposure, post exposure; Undisturbed vs exposure vs post exposure	R1, R2, PB1	Females	glmer(response~ rank + (group * tourists in the forest each month) + monthly number of crop defense events + fruit availability + number of infants + (1|Monkey ID) + (1|sample), family="poisson", data=databasename)
			Males	glmer(response~ rank + (group * tourists in the forest each month) + monthly number of crop defense events + fruit availability + number of estrous females + (1|Monkey ID) + (1|sample), family="poisson", data=databasename)
